# Supplementary material for: Phytotoxic Metabolites Isolated from Aspergillus sp., an Endophytic Fungus of Crassula arborescens
Source: MDPI journal article supplement (doi:10.3390/molecules27227710), 2022-11-09
Supplement: s1 [file s1]

## Supporting Information

### Contents

**Figure S1a.** Experimental ECD spectrum of **1**

**Figure S1b.** Experimental ECD spectrum and calculated ECD data of aspertamarinolide A

**Figure S2.** HRESIMS spectrum of **1**

**Figure S3.**  $^1\text{H}$  NMR spectrum (600 MHz,  $\text{CD}_3\text{OD}$ ) of **1**

**Figure S4.**  $^{13}\text{C}$  NMR spectrum (150 MHz,  $\text{CD}_3\text{OD}$ ) of **1**

**Figure S5.** HSQC spectrum of **1**

**Figure S6.** HMBC spectrum of **1**

**Figure S7.**  $^1\text{H}$ - $^1\text{H}$  COSY spectrum of **1**

**Figure S8.** NOESY spectrum of **1**

**Figure S9.**  $^1\text{H}$  NMR spectrum (600 MHz,  $\text{CD}_3\text{OD}$ ) of **2**

**Figure S10.**  $^{13}\text{C}$  NMR spectrum (150 MHz,  $\text{CD}_3\text{OD}$ ) of **2**

**Figure S11.**  $^1\text{H}$  NMR spectrum (400 MHz,  $\text{CD}_3\text{OD}$ ) of **3**

**Figure S12.**  $^{13}\text{C}$  NMR spectrum (100 MHz,  $\text{CD}_3\text{OD}$ ) of **3**

**Figure S13.**  $^1\text{H}$  NMR spectrum (600 MHz,  $\text{CD}_3\text{OD}$ ) of **4**

**Figure S14.**  $^{13}\text{C}$  NMR spectrum (150 MHz,  $\text{CD}_3\text{OD}$ ) of **4**

**Figure S15.**  $^1\text{H}$  NMR spectrum (600 MHz,  $\text{CDCl}_3$ ) of **5**

**Figure S16.**  $^{13}\text{C}$  NMR spectrum (150 MHz,  $\text{CDCl}_3$ ) of **5**

**Figure S17.**  $^1\text{H}$  NMR spectrum (400 MHz,  $\text{CDCl}_3$ ) of **6**

**Figure S18.**  $^{13}\text{C}$  NMR spectrum (100 MHz,  $\text{CDCl}_3$ ) of **6**

**Figure S19.**  $^1\text{H}$  NMR spectrum (400 MHz,  $\text{CDCl}_3$ ) of **7**

**Figure S20.**  $^{13}\text{C}$  NMR spectrum (100 MHz,  $\text{CDCl}_3$ ) of **7**

**Figure S21.**  $^1\text{H}$  NMR spectrum (400 MHz,  $\text{CD}_3\text{OD}$ ) of **8**

**Figure S22.**  $^{13}\text{C}$  NMR spectrum (100 MHz,  $\text{CD}_3\text{OD}$ ) of **8**

**Figure S23.**  $^1\text{H}$  NMR spectrum (400 MHz,  $\text{CDCl}_3$ ) of **9**

**Figure S24.**  $^{13}\text{C}$  NMR spectrum (100 MHz,  $\text{CDCl}_3$ ) of **9**

**Figure S25.** The colony and microscopic morphology of strain MJ01

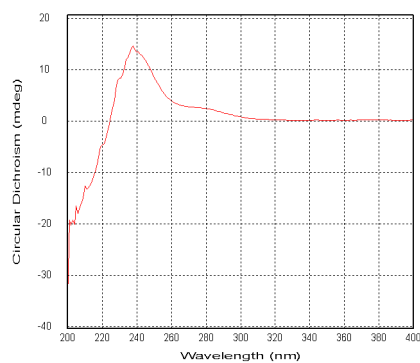

**Figure S1a.** Experimental ECD spectrum of **1**

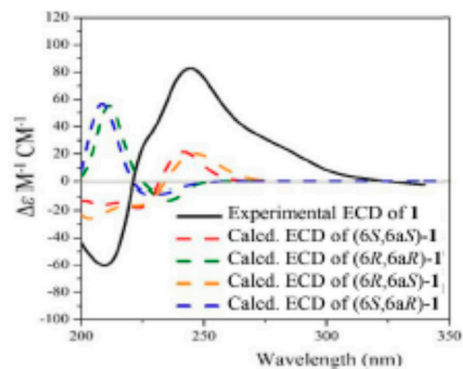

**Figure S1b.** Experimental ECD spectrum and calculated ECD data of aspertamarinolide A

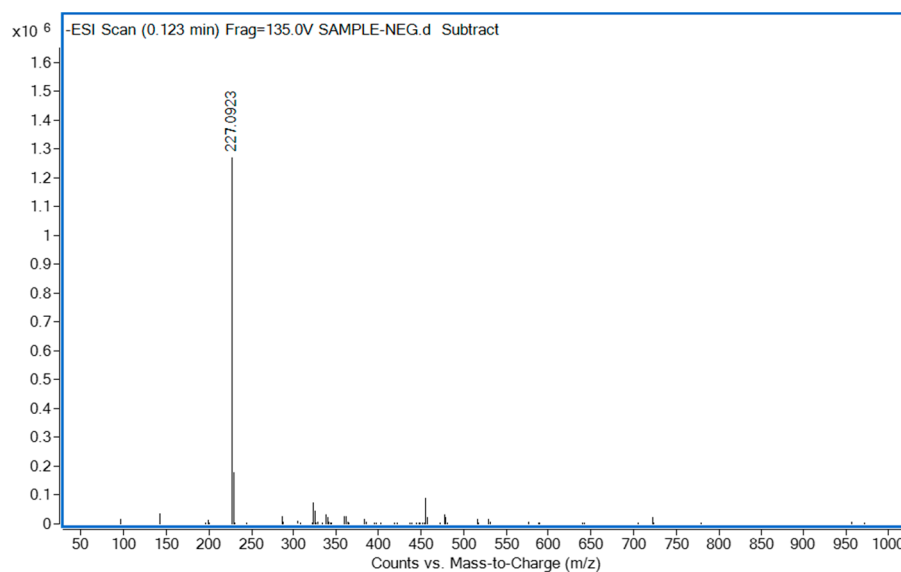

**Figure S2.** HRESIMS spectrum of **1**

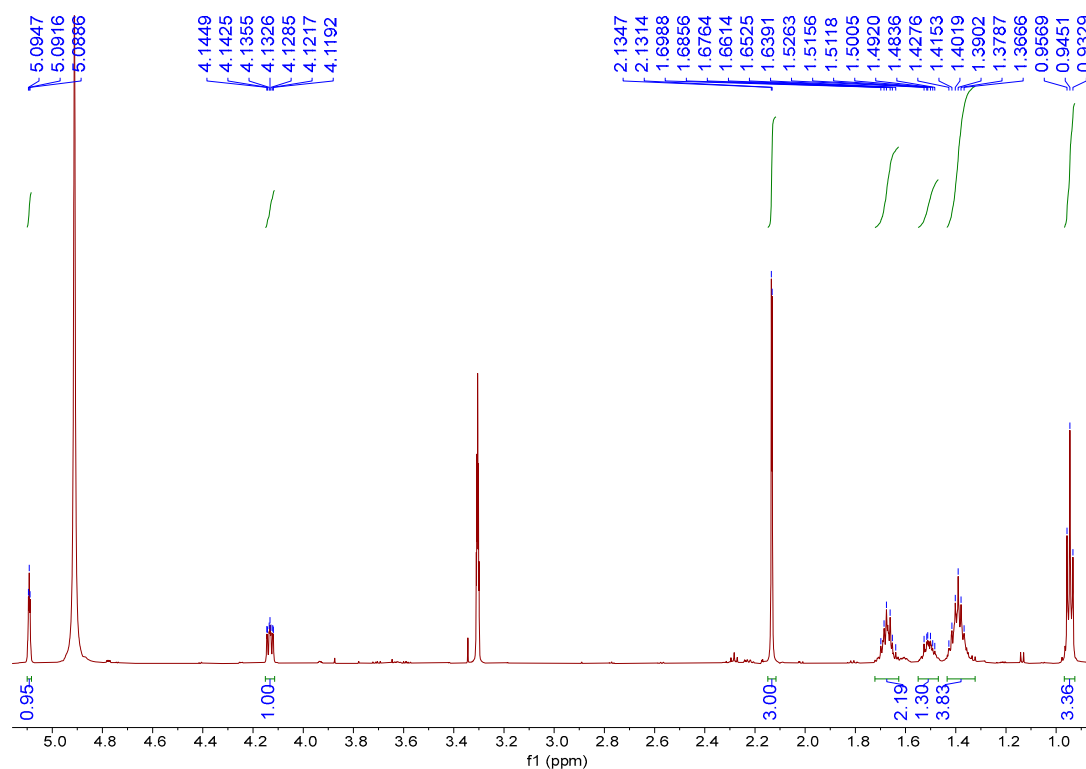

**Figure S3.** <sup>1</sup>H NMR spectrum (600 MHz, CD<sub>3</sub>OD) of **1**

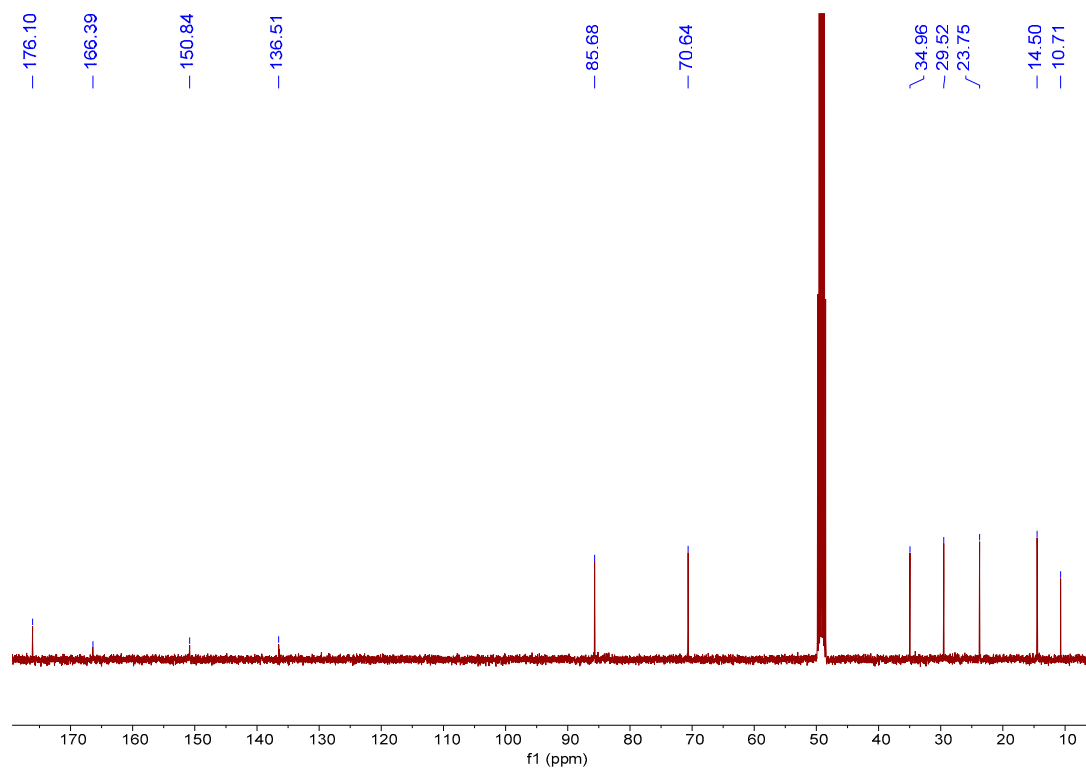

**Figure S4.** <sup>13</sup>C NMR spectrum (150 MHz, CD<sub>3</sub>OD) of **1**

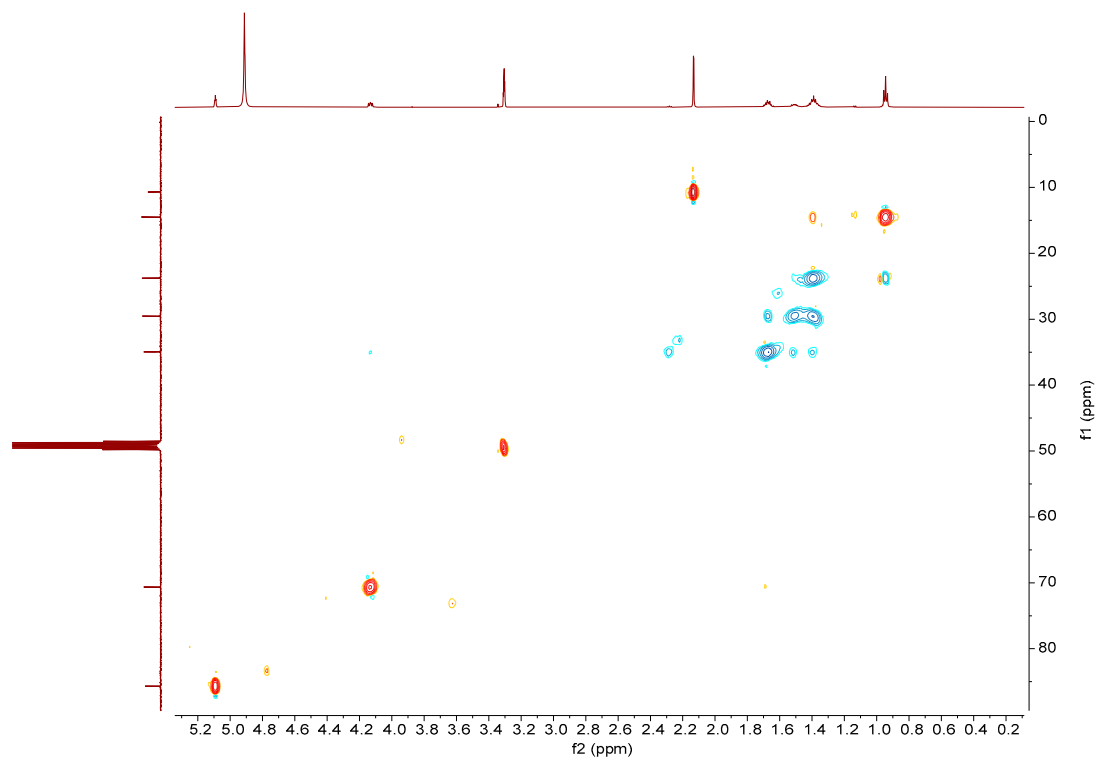

Figure S5. HSQC spectrum of **1**

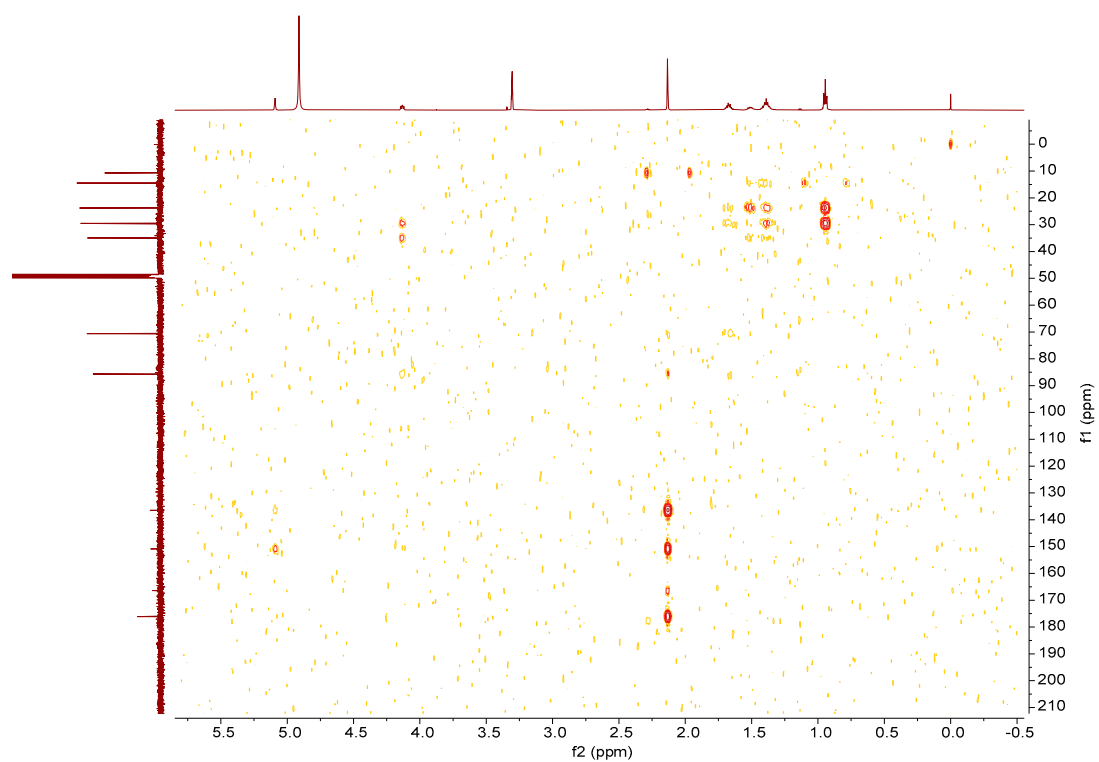

Figure S6. HMBC spectrum of **1**

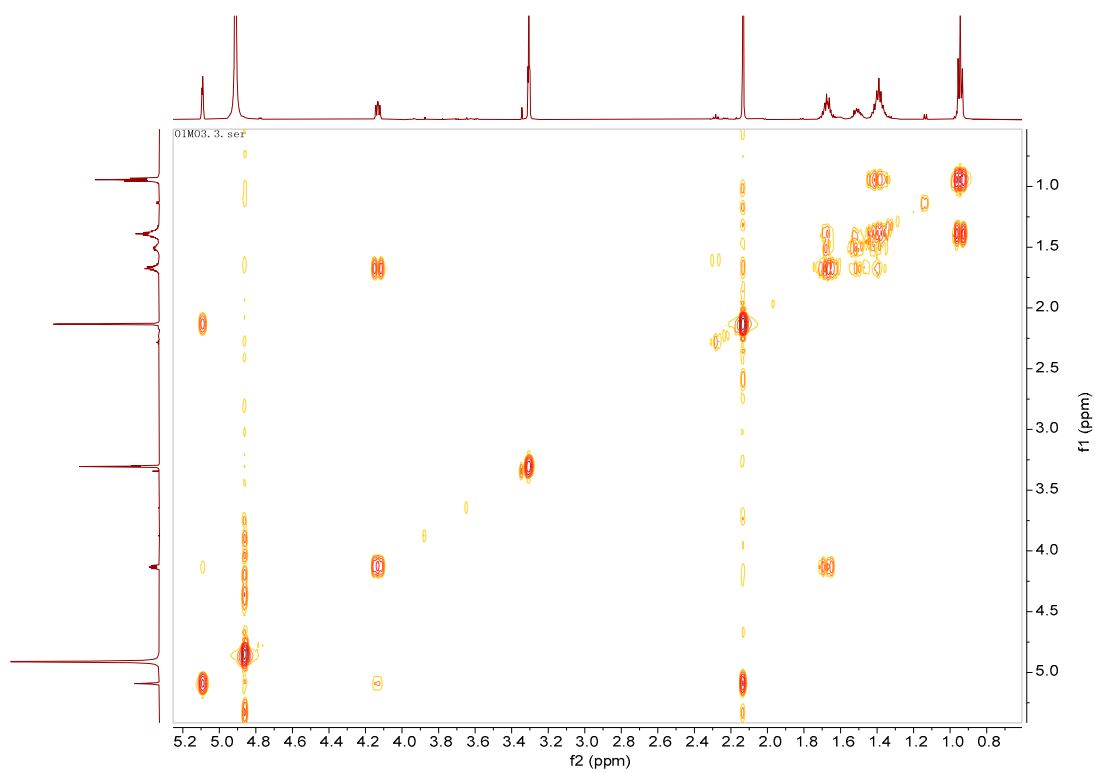

**Figure S7.**  $^1\text{H}$ - $^1\text{H}$  COSY spectrum of **1**

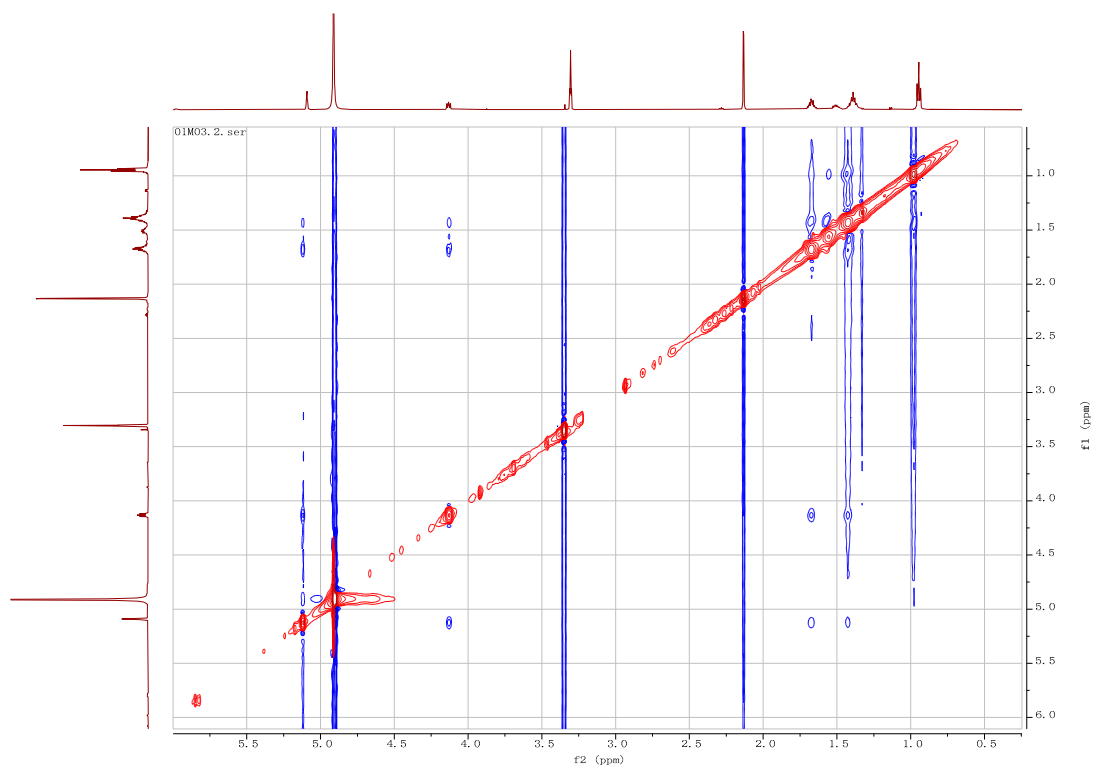

**Figure S8.** NOESY spectrum of **1**

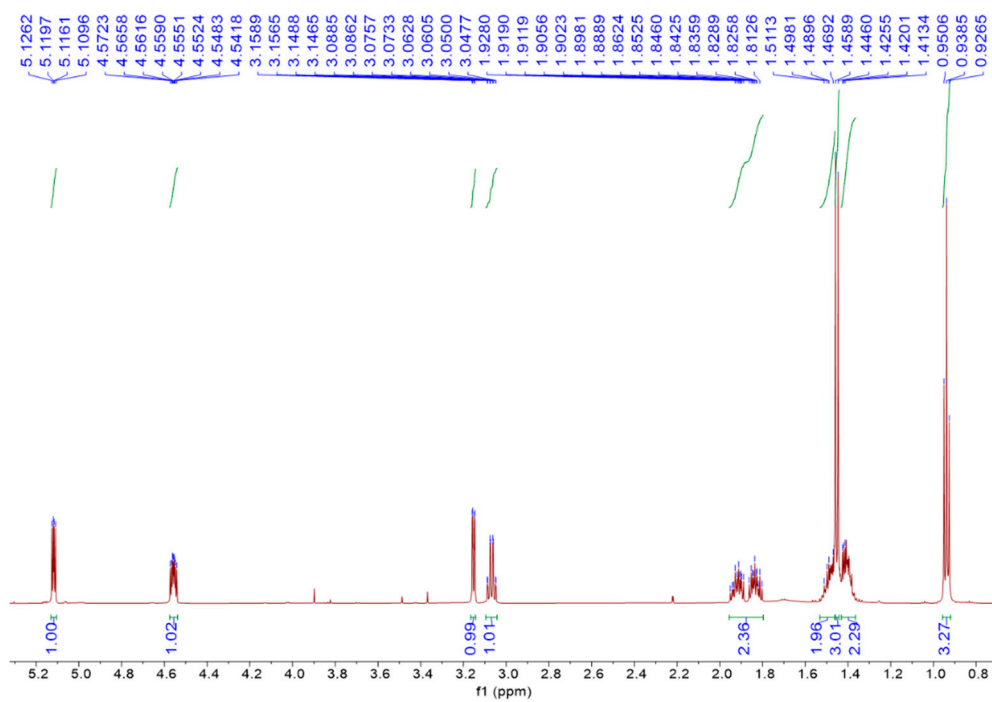

**Figure S9.** <sup>1</sup>H NMR spectrum (600 MHz, CDCl<sub>3</sub>) of **2**

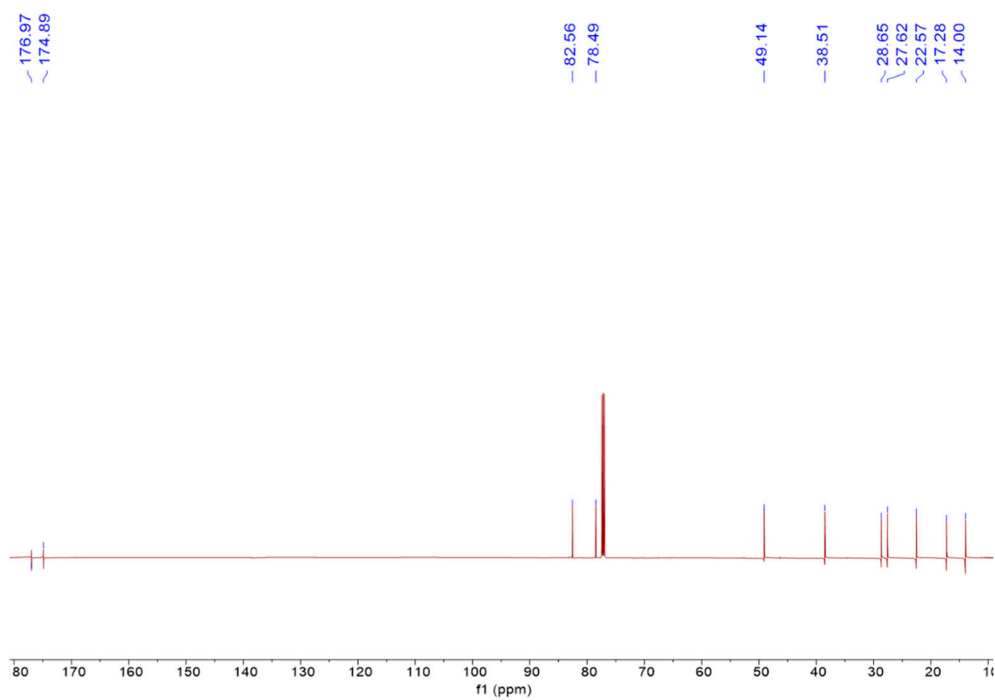

**Figure S10.** <sup>13</sup>C NMR spectrum (150 MHz, CDCl<sub>3</sub>) of **2**

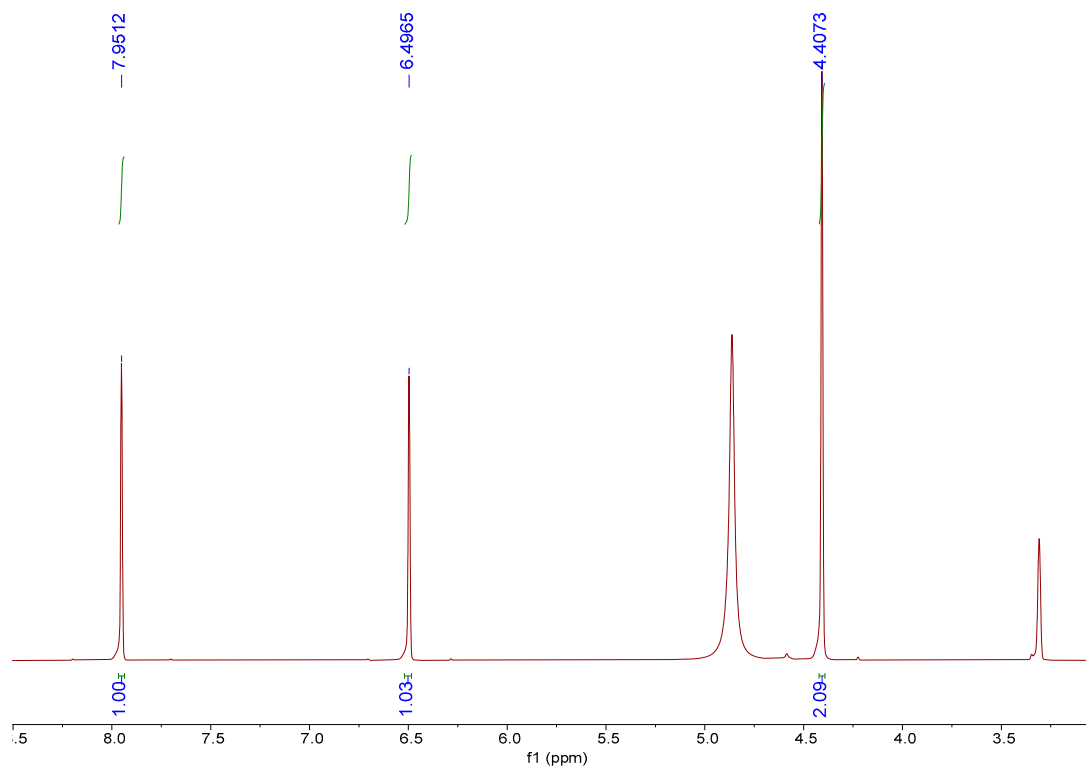

**Figure S11.** <sup>1</sup>H NMR spectrum (400 MHz, CD<sub>3</sub>OD) of **3**

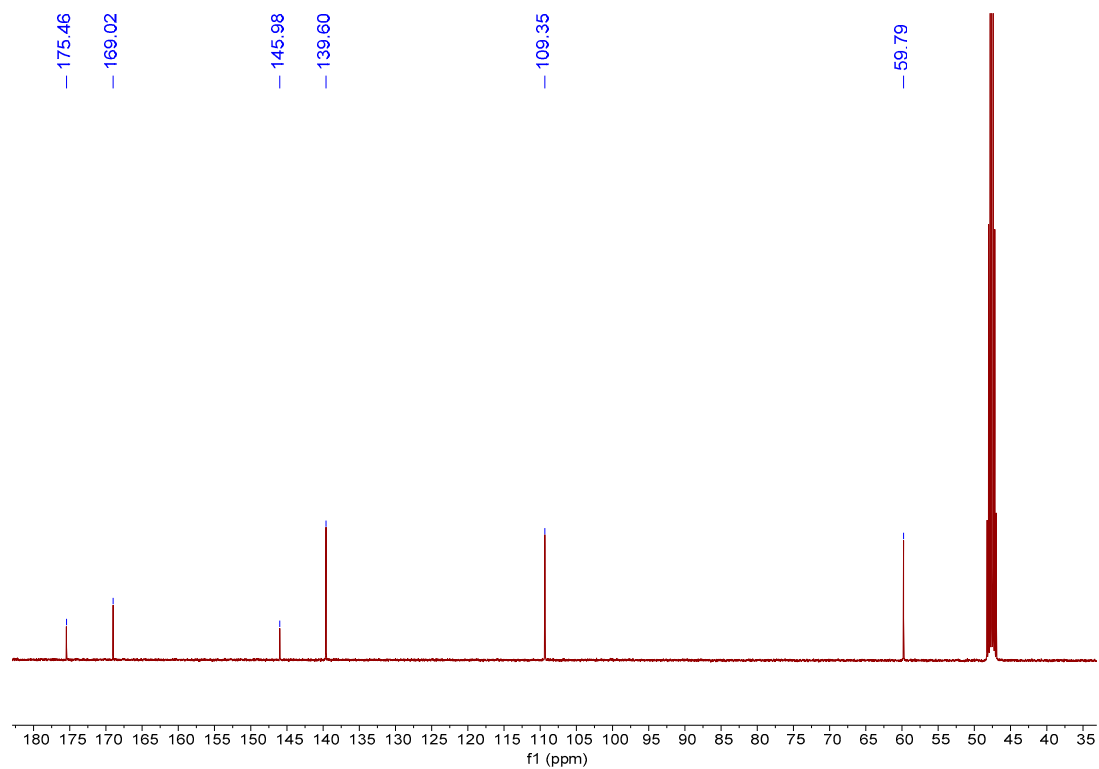

**Figure S12.** <sup>13</sup>C NMR spectrum (100 MHz, CD<sub>3</sub>OD) of **3**

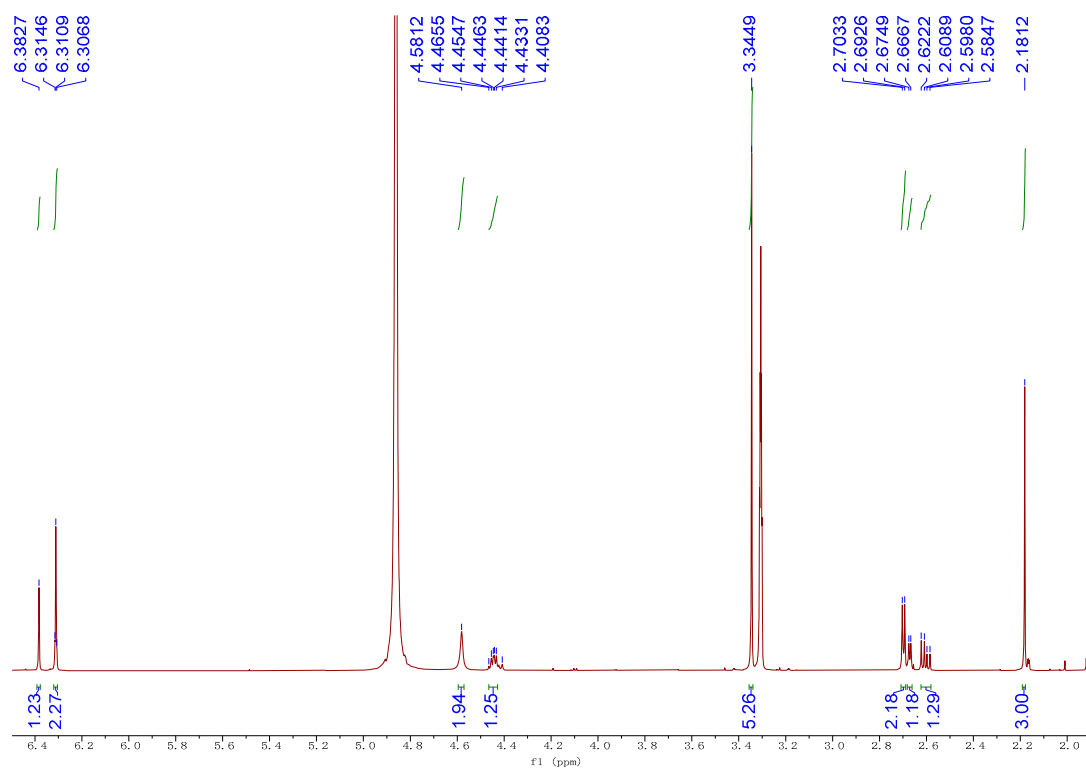

**Figure S13.** <sup>1</sup>H NMR spectrum (600 MHz, CD<sub>3</sub>OD) of 4

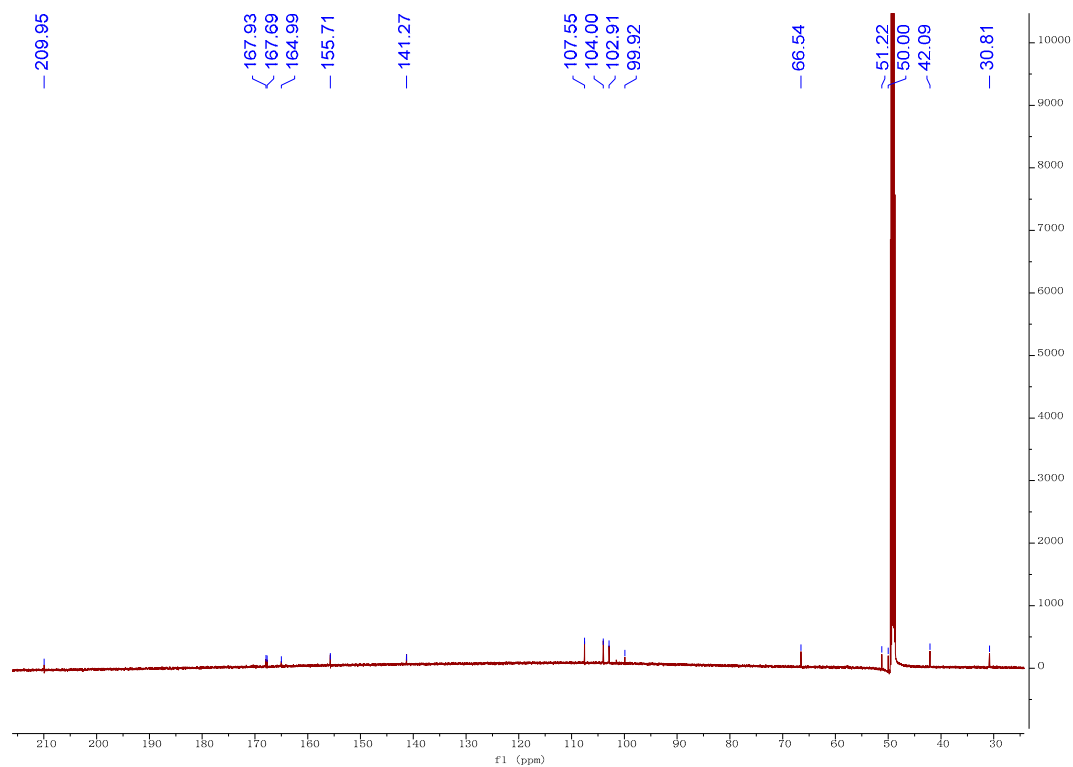

**Figure S14.** <sup>13</sup>C NMR spectrum (150 MHz, CD<sub>3</sub>OD) of 4



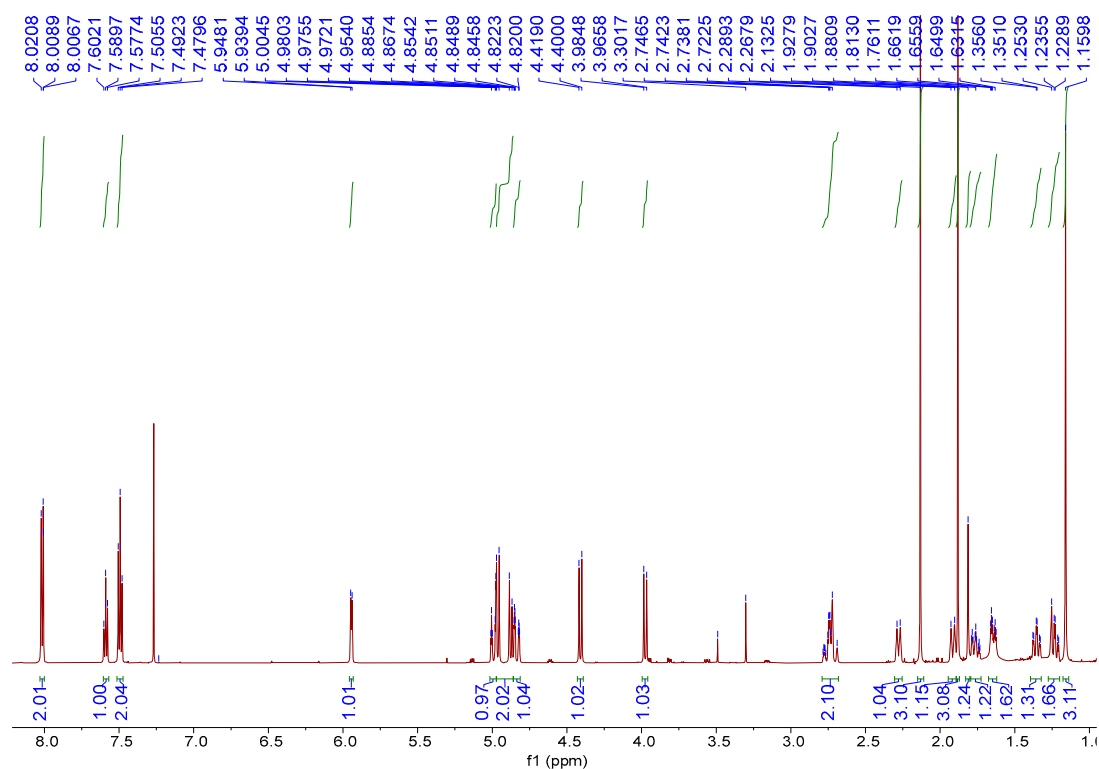

**Figure S15.** <sup>1</sup>H NMR spectrum (600 MHz, CDCl<sub>3</sub>) of 5

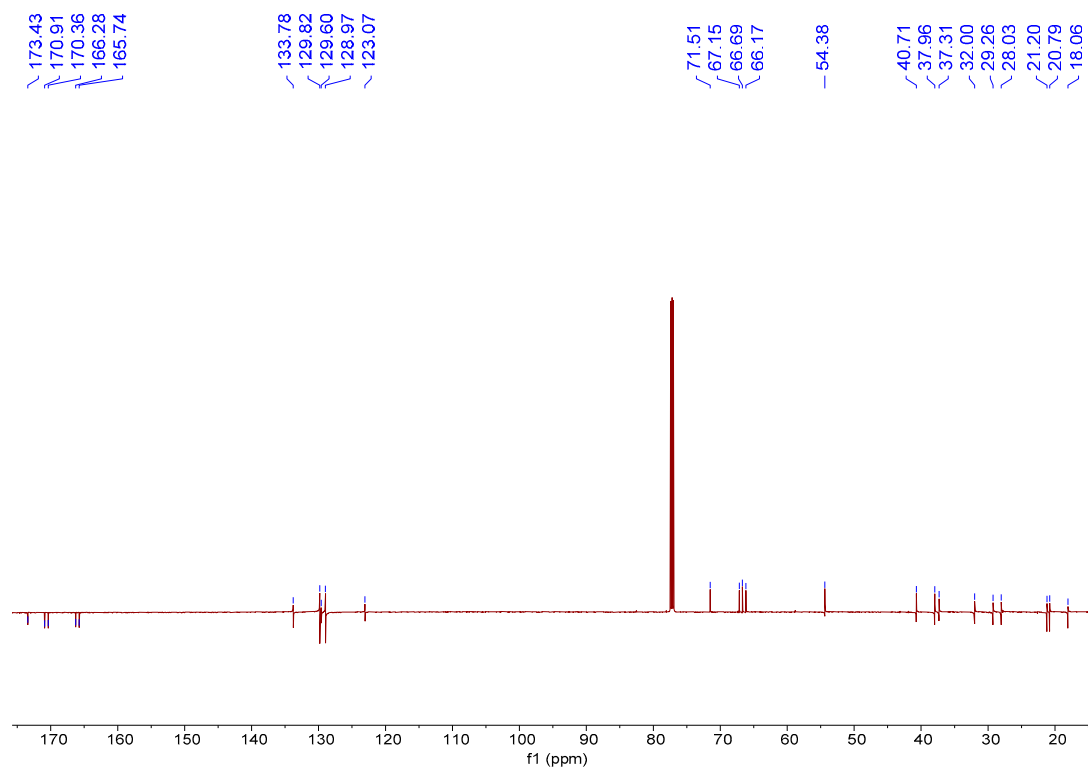

**Figure S16.** <sup>13</sup>C NMR spectrum (150 MHz, CDCl<sub>3</sub>) of 5

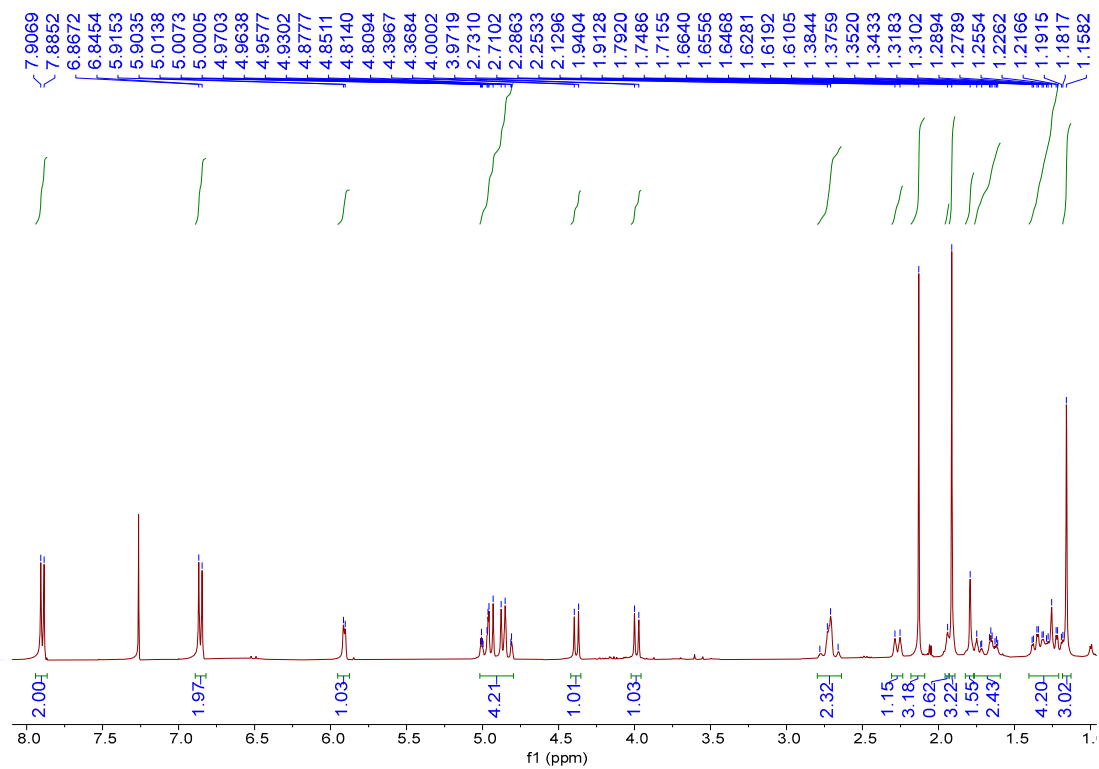

Figure S17. <sup>1</sup>H NMR spectrum (400 MHz, CDCl<sub>3</sub>) of 6

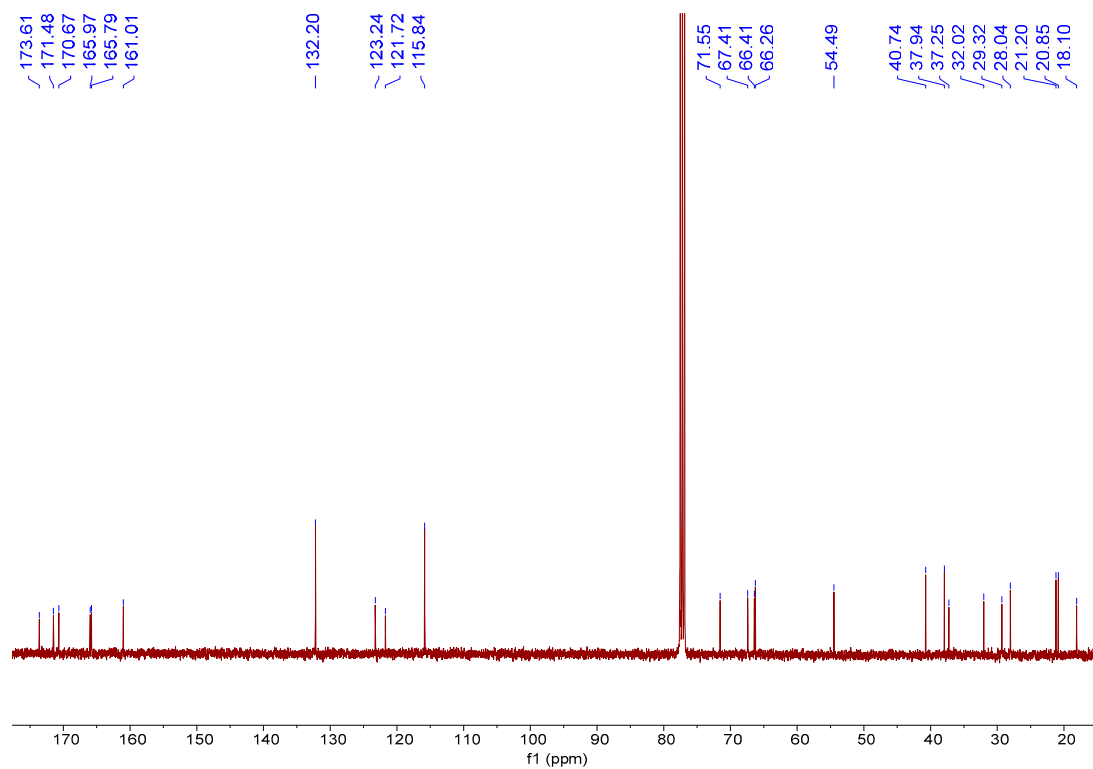

Figure S18. <sup>13</sup>C NMR spectrum (100 MHz, CDCl<sub>3</sub>) of 6

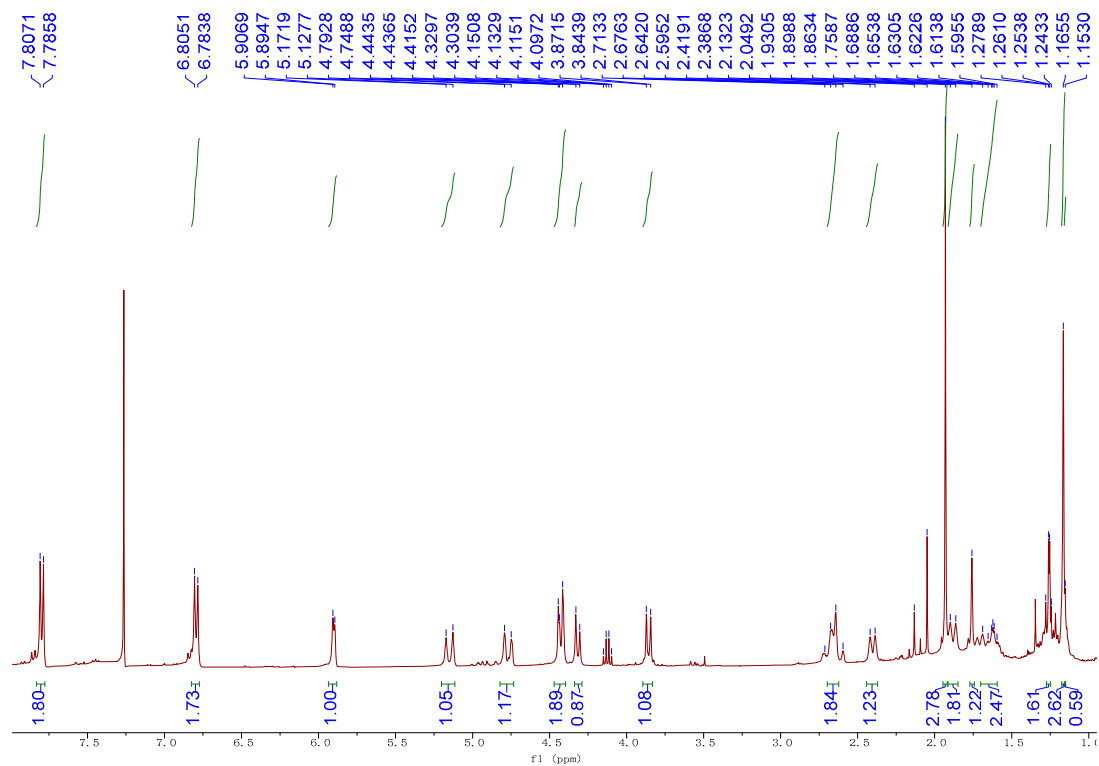

**Figure S19.** <sup>1</sup>H NMR spectrum (400 MHz, CDCl<sub>3</sub>) of **7**

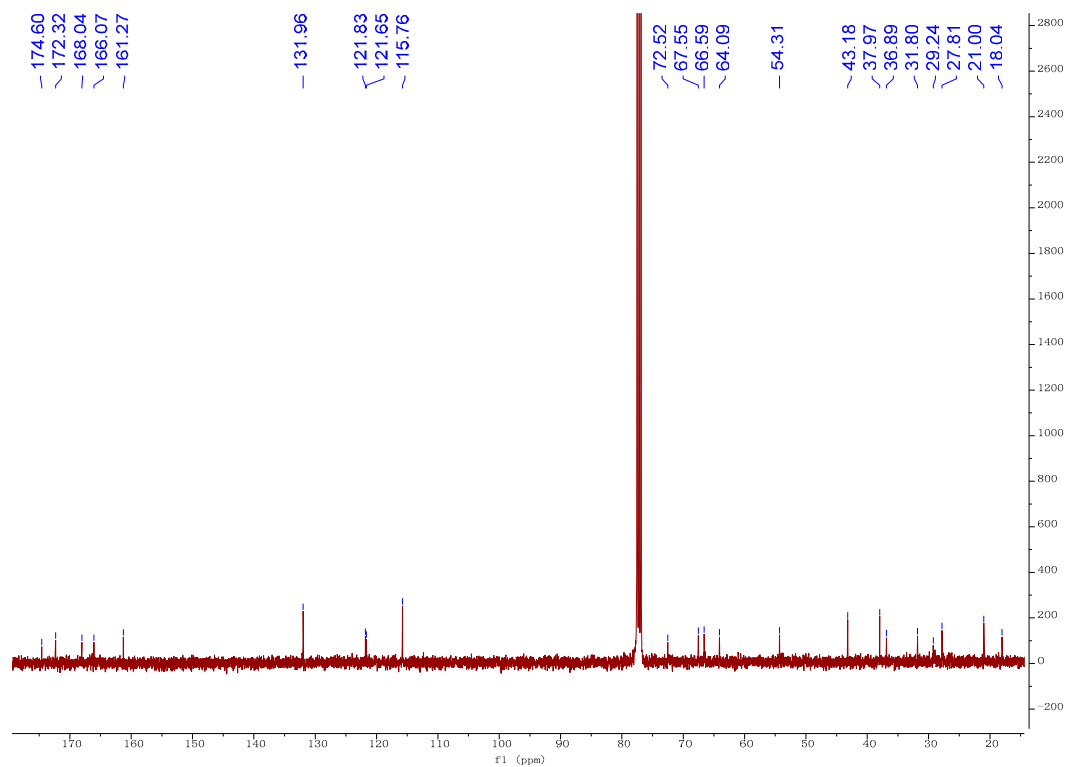

**Figure S20.** <sup>13</sup>C NMR spectrum (100 MHz, CDCl<sub>3</sub>) of **7**

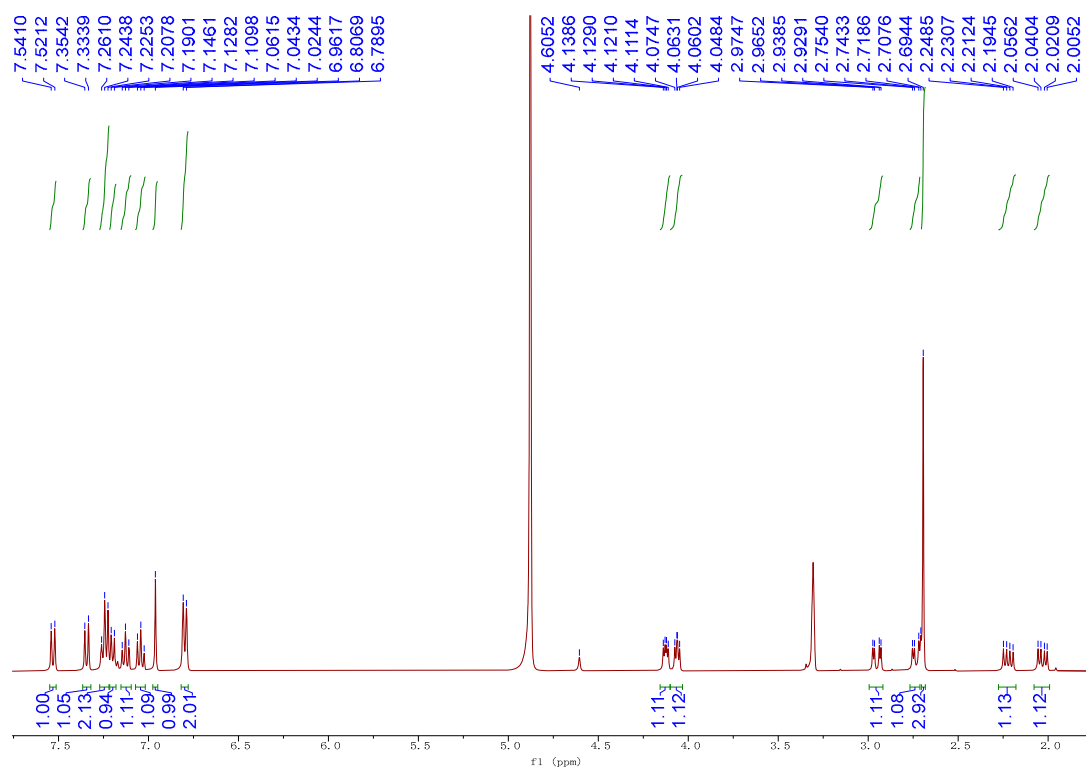

**Figure S21.** <sup>1</sup>H NMR spectrum (400 MHz, CD<sub>3</sub>OD) of **8**

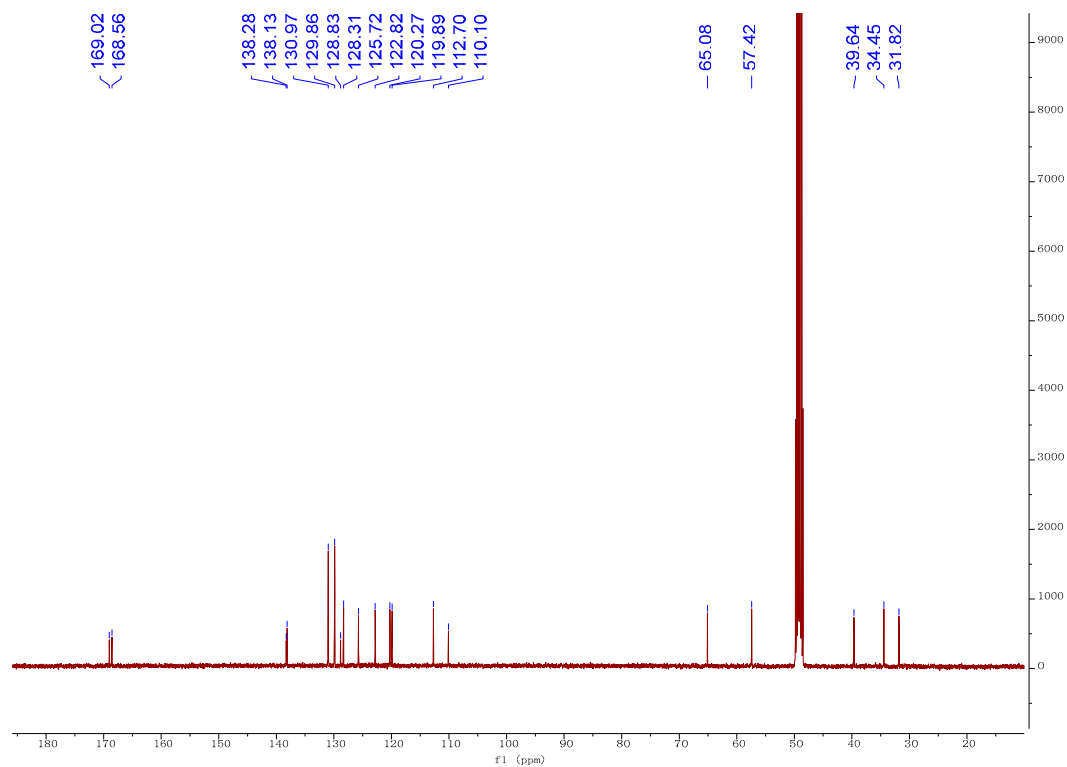

**Figure S22.** <sup>13</sup>C NMR spectrum (100 MHz, CD<sub>3</sub>OD) of **8**

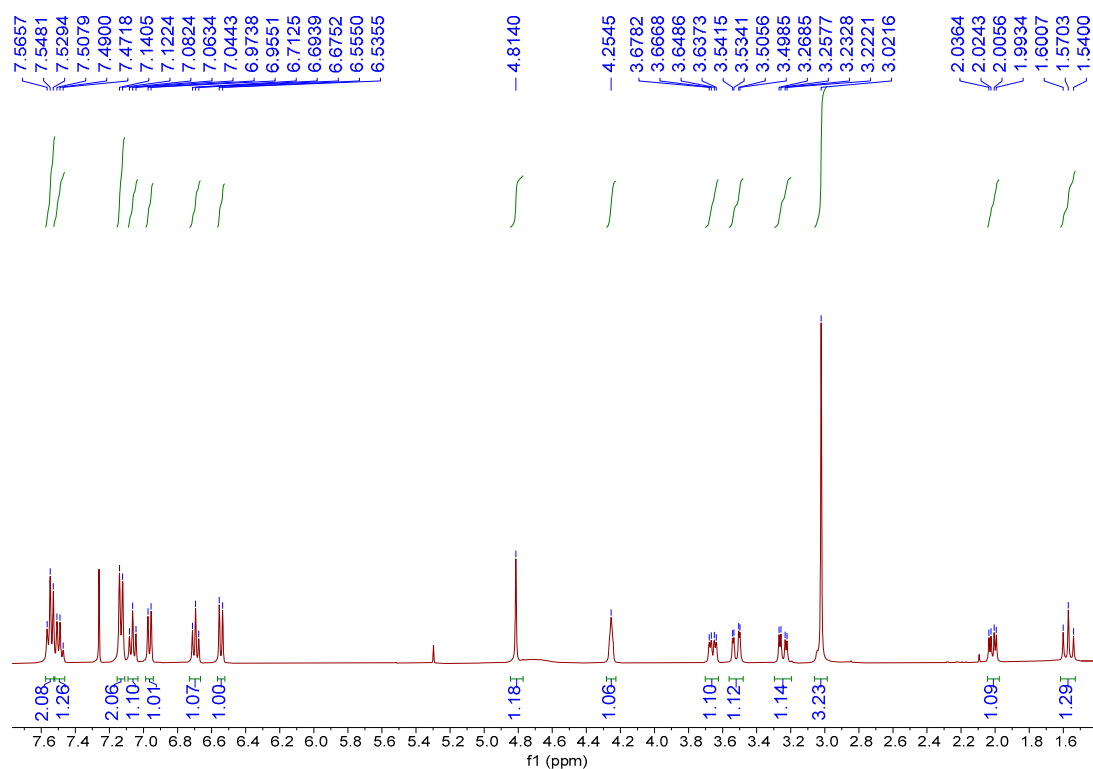

**Figure S23.** <sup>1</sup>H NMR spectrum (400 MHz, CDCl<sub>3</sub>) of **9**

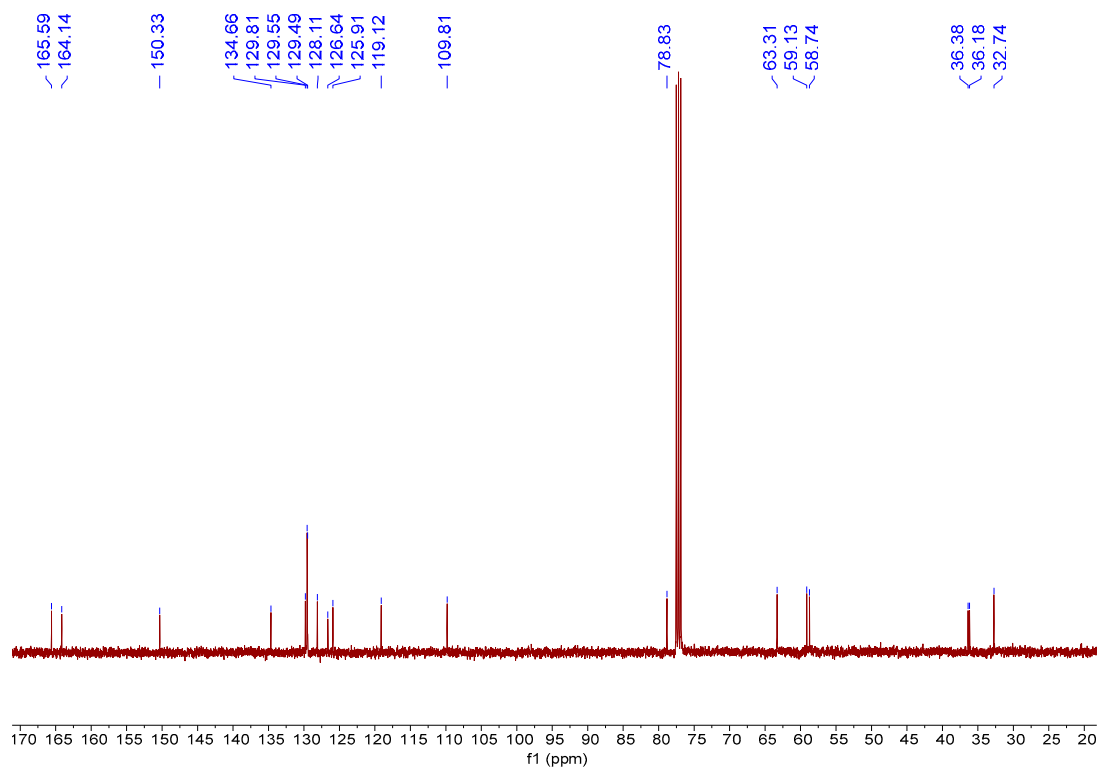

**Figure S24.** <sup>13</sup>C NMR spectrum (100 MHz, CDCl<sub>3</sub>) of **9**

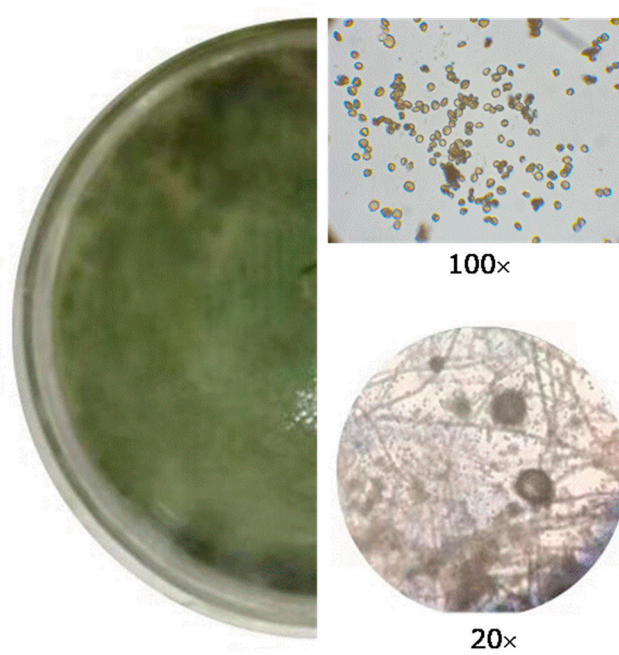

**Figure S25.** The colony and microscopic morphology of strain MJ01
